# Supplementary material
Source: HighWire-hosted journal article supplement (https://care.diabetesjournals.org/content/suppl/2007/07/10/dc07-0002)

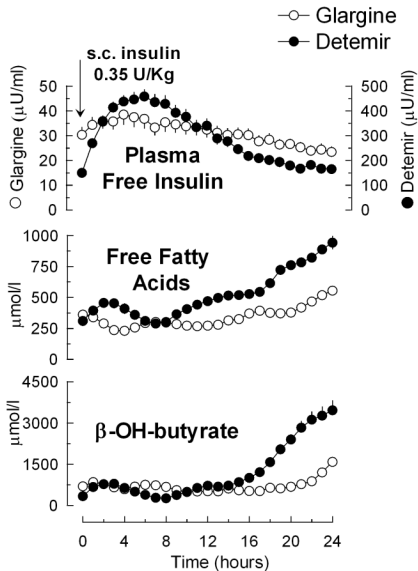

(N=24)  
Mean $\pm$ SE

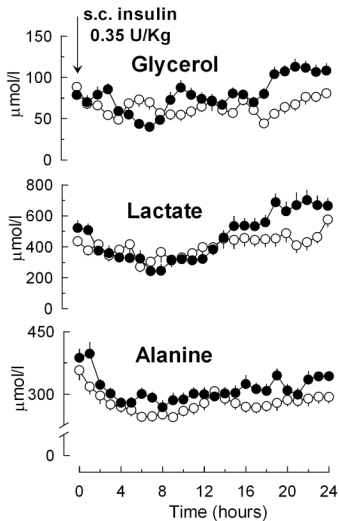

Supplement: DC070002OnlineAppendixFigure.pdf [file DC070002OnlineAppendixFigure.pdf]
